# Supplementary material
Source: PubMed Central journal article supplement (PMC3007140)
Supplement: JCI42520sd.pdf [file JCI42520sd.pdf]

DNA Alignment (Optimized Region). The changed codons are indicated as red letters:

|           |     |                                                                |                                        |
|-----------|-----|----------------------------------------------------------------|----------------------------------------|
| Optimized | 22  | ATGGTATCTAAAGGAGAAGAATTATTTACTGGAGTTGTTCCTATTTT                | AGTTAGTTGAATTAGAT                      |
| Original  | 22  | ATGGTGAGCAAGGGCGAGGAGCTGTTTACC                                 | GGGGTGGTGCCCATCCTGGTTCGAGCTGGAC        |
| Optimized | 82  | GGT                                                            | GATGCTACATAT                           |
| Original  | 82  | GGCGACGTAAACGGCCACAAGTTCAGCGTGTCCGGC                           | GAGGGCGAGGGCGATGCCACCTAC               |
| Optimized | 142 | GGTAAATTAACATTA                                                | TGGCTACA                               |
| Original  | 142 | GGCAAGCTGACCCTGAAGTTCATCTGCACCACCGCAAGCTGCCGTGCCCTGGCCACC      |                                        |
| Optimized | 202 | TTAGTAACTACATTAACATATGGTGTACAATGTTTTTCTCGTTATCCAGATCATATGAAA   |                                        |
| Original  | 202 | CTCGTGACCACCTGACCTACGGCGTGCAGTGCTTCAGCCGCTACCCCGACCACATGAAG    |                                        |
| Optimized | 262 | CAACATGATTTTTTTAAATCAGCAATGCCA                                 | GAAAGGTTATGTACAAGAACGAACTATTTTT        |
| Original  | 262 | CAGCAGACTTCTTCAAGTCCGCCATGCCCGAAGGCTACGTCCAGGAGCGCACCATCTTC    |                                        |
| Optimized | 322 | TTTAAAGATGATGGTAATTATAAAACTCGTGCTGAAGTAAAATTTGAAGGTGATACTTTA   |                                        |
| Original  | 322 | TTCAAGGACGACGGCAACTACAAGACCCGCGCCGAGGTGAAGTTCGAGGGCGACACCCTG   |                                        |
| Optimized | 382 | GTGAATAGAATTGAATTTAAAGGTATAGATTTCAAGAAGATGGTAATATTTTAGGTCAT    |                                        |
| Original  | 382 | GTGAACCGCATCGAGCTGAAGGGCATCGACTTCAAGGAGGACGGCAACATCCTGGGGCAC   |                                        |
| Optimized | 442 | AAATTAGAATATAACTATAACAGTCATAATGTGTATATTATGGCTGATAAAACAAAAAAT   |                                        |
| Original  | 442 | AAGCTGGAGTACAACACTACAACAGCCACAACGTCTATATCATGGCCGACAAGCAGAAGAAC |                                        |
| Optimized | 502 | GGTATTTAAAGTTAACTTTTAAATACGTCATAATATAGAAGATGGAAGTGTTC          | AATTAGCT                               |
| Original  | 502 | GGCATCAAGGTGAACCTTCAAGATCCGCCACAACATCGAGGACGGCAGCGTGCAGTTCGCC  |                                        |
| Optimized | 562 | GATCATTATCAACAAAATACCCAATAGGTGATGGTCCAGTTTTATTACCTGATAATCAT    |                                        |
| Original  | 562 | GACCACTACCAGCAGAACACCCCATCGGGCAGCGCCCGTGCTGCTGCCCGACAACCAC     |                                        |
| Optimized | 622 | TATTTAAGTACACAATCTGCATTATCAAAGATCCAATGAAAACGAGATCATATGGTA      |                                        |
| Original  | 622 | TACCTGAGCACCAGTCCGCCCTGAGCAAAGACCCCAACGAGAAGCGGATCACATGGTC     |                                        |
| Optimized | 682 | TTATTAGAATTTGTTACAGCAGCTGGTATAACTTTAGGAATGGATGAATTATATAAA      |                                        |
| Original  | 682 | CTGCTGGAGTTCTGTACC                                             | CGCCCGGGATCACTCTCGGCATGGACGAGCTGTACAAG |

**Supplemental Figure 1.** Codon optimization for the *egfp* gene. The *egfp* gene was optimized for *Staphylococcus* codon usage and synthesized by Genescript Corp. The synthesized gene was cloned in the *Sma*I site of pUC57, excised via *Pst*I and *Hind*III, and cloned in pRB473. The final construct contains a Shine/Dalgarno sequence next to the *Pst*I site in front of the *egfp* ATG start codon: ctgcagaggaggtaaagtataatg. To construct the *psmβ* promoter *egfp* fusion, the *psmβ* promoter was cloned in the *Eco*RI/*Bam*HI sites in front of the *egfp* gene, using the multiple cloning site of plasmid pRB473.

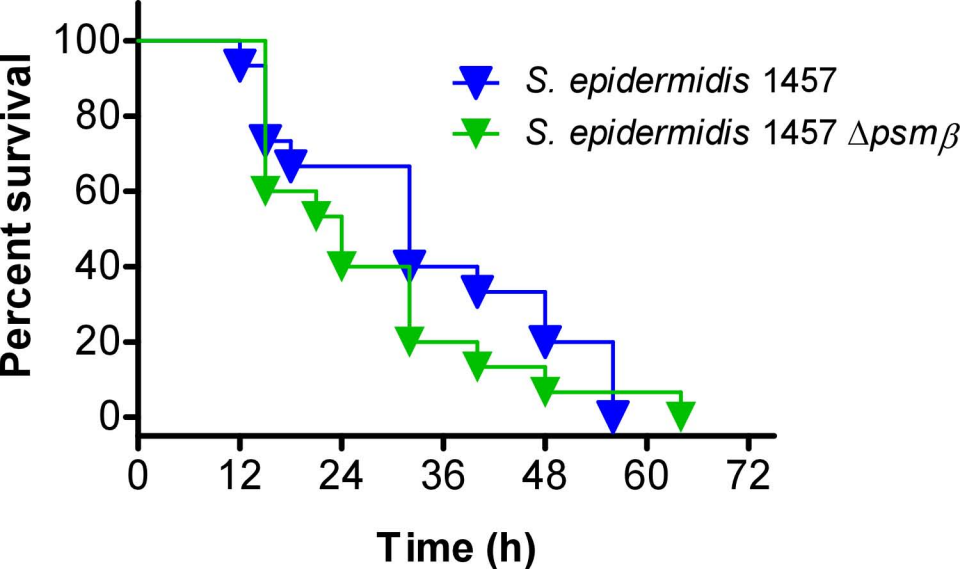

**Supplemental Figure 2.** Bacteremia model. Immune-compromised Nu/Nu B/C CRL female mice (Charles River Laboratories) were between 6 and 8 weeks of age at the time of use. *S. epidermidis* 1457 wild-type or isogenic  $\Delta psm\beta$  strains were grown to mid-exponential phase, washed once with sterile PBS, then resuspended in PBS at  $1 \times 10^9$  CFUs/100  $\mu$ l. Each animal received  $10^9$  CFUs of live *S. epidermidis* 1457 wild-type or isogenic  $\Delta psm\beta$  strains in 100  $\mu$ l sterile PBS by retro-orbital injection via the right eye. Control animals received sterile PBS only. After inoculation, mouse health and disease advancement were monitored every 3 h for the first 24 h, then every 8 h for up to 72 h. Mice were euthanized immediately if they showed signs of respiratory distress, mobility loss or inability to eat and drink. All surviving animals were euthanized at the end of the study.

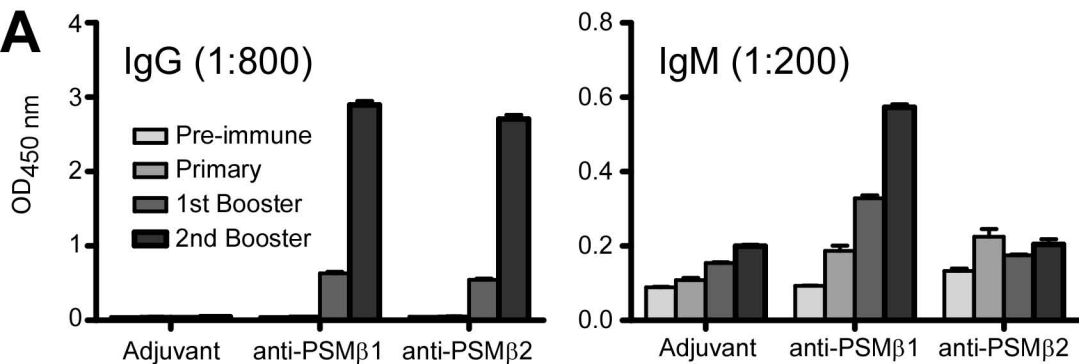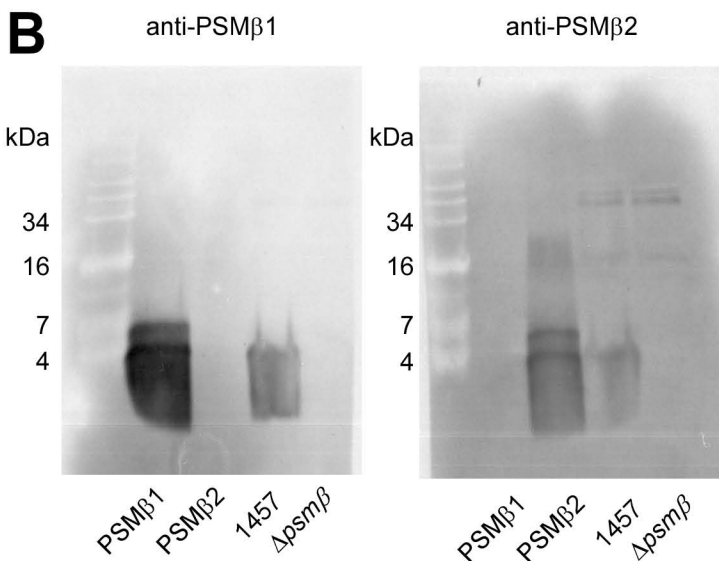

**Supplemental Figure 3.** Anti-PSM antisera. Antisera were raised separately against PSM $\beta$ 1 and PSM $\beta$ 2 in mice. (A) Immunogenicity. ELISAs of mouse sera using IgG or IgM-specific horse radish peroxidase-labeled goat antibodies and PSM $\beta$ 1- or PSM $\beta$ 2-coated microtiter plates. (B) Specificity. Obtained sera were blocked with extracts from *S. epidermidis*  $\Delta$ psm $\beta$  and purified using Protein G affinity columns. SDS-PAGE on a 16% Tricine gel with synthetic PSM $\beta$ 1 and PSM $\beta$ 2, and culture filtrates from *S. epidermidis* wild-type and  $\Delta$ psm $\beta$  strains were used to analyze specificity of obtained antisera. Horseradish peroxidase conjugated goat anti-mouse IgG and enhanced chemoluminescence were used to visualize reactions.

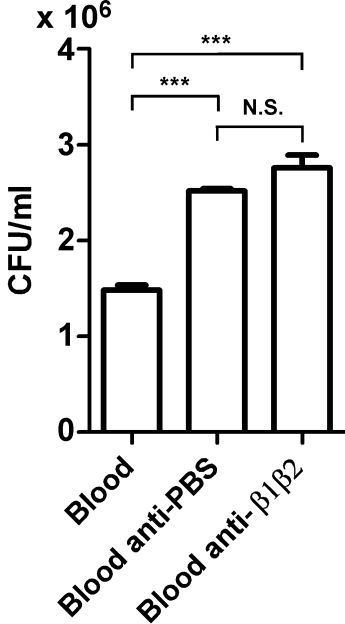

**Supplemental Figure 4.** Opsonophagocytosis assay with anti-PSM $\beta$  antiserum. Dilutions of bacteria, in PBS, were opsonized with purified mouse antibodies against PBS or PSM $\beta$ 1/PSM $\beta$ 2 in a 1:1 ratio for 30 min at 37°C. Blood obtained from Female Nu/Nu B/C CRL mice was incubated for 60 min at 37°C with the opsonized bacteria ( $5 \times 10^4$  CFU) to a ratio of antibody:bacteria:blood at 1:1:16 in a total volume of 100  $\mu$ l. Surviving bacteria were counted by spotting 400  $\mu$ l (16 x 25  $\mu$ l aliquots) onto TSB plates. N.S., not significant; \*\*\*,  $p < 0.001$ ; 1-way ANOVA with Bonferroni post-test.
